# Supplementary material for: Structural Insights into Rational Design of Single-Domain Antibody-Based Antitoxins against Botulinum Neurotoxins
Source: PubMed Central journal article supplement — Cell Rep. Author manuscript; Available in PMC 2020 Apr 7. (PMC7138525; doi:10.1016/j.celrep.2020.01.107), 2020-02-25
Supplement: NIHMS1566843-supplement-1.pdf [file NIHMS1566843-supplement-1.pdf]

**Cell Reports, Volume 30**

**Supplemental Information**

**Structural Insights into Rational Design  
of Single-Domain Antibody-Based  
Antitoxins against Botulinum Neurotoxins**

**Kwok-ho Lam, Jacqueline M. Tremblay, Edwin Vazquez-Cintron, Kay Perry, Celinia Ondeck, Robert P. Webb, Patrick M. McNutt, Charles B. Shoemaker, and Rongsheng Jin**

A

|         | CDR1                   | CDR2                  | CDR3                           |
|---------|------------------------|-----------------------|--------------------------------|
| JEQ-H11 | SGGGLVQAGGSLRLSCAGSGRS | --FSAAVMGWFRQAPGKERE  | FVAALRQIIIGSTHYADSVKGRFTISRDN  |
| JFM-A11 | TGGGLVQPGGALRLSCAASVFG | --MDYYYIGWVRQAPGKERE  | GVSCISN-IGRTHYADSVKGRFTISRDN   |
| JFN-B5  | SGGGLVQPGGSLRLSCAASGQS | --LDNYIIGWFRQAPGKERE  | GVSCIDRTGTVTHYADSVKGRFTISTDN   |
| JFM-B9  | TGGGLVQAGGSLRLSCTASGRT | --SSFYALAWFRQGP       | KEREFVAAIGWIDGSTRYTDSAKGRFTISR |
| JLI-G10 | SGGGLVQPGGSLRLSCAASILT | YLDYYYIGWVRQAPGKERE   | GVSCISSTDGATYYADSVKGRFTISR     |
| JLI-H11 | SGGGLVQPGESLRLSCGASGMS | --LDYYAIAWYRQAPGKERE  | GVSCISVSGSSAQYLD               |
| JLJ-F9  | SGGGLVQAGGSLRLSCAPSRLT | --LDFFAIAWFRQAPGKERE  | GVSCISSHDGSTYYTDSVKGRFTISR     |
| JLJ-G3  | SGGGLVQSGGSLRLSCAASGSI | --DSLHYMGWYRQAPGKEREL | VARVQD-GGSTAYKDSVKGRFTISR      |
| JLK-D7  | SGGGLVQAGGSLRLSCAASGFT | --LGHNQVAWFRQAPGKERE  | GVACISATGASTHYADPVKGRFTVSR     |
| JLK-G12 | SGGGLVQAGGSLRLSCAASEFR | --AEHFAVGWFRQAPGKERE  | GVSCVDASGDSTAYADSVKGRFTISR     |
| JLO-C8  | SGGGLVQPGGSLRLSCAASGRA | --LNYYVIGWFRQAPGKERE  | GVSCIASSEAYTDYADSVQGRFTISR     |
| JLO-G7  | SGGGLVQAGGSLRLSCAASGFP | --FGSYYMSWVRQAPGKPE   | WVSDISNGGIITRYSDSVKGRFTISR     |
| JLO-G11 | SGGGLVQPGGSLRLSCEASGFH | --LEHFVAGWFRQAPGKERE  | GVSCISASGSDTTYADSVKGRSTISR     |
| JLU-D10 | SGGGLVQPGGSLRLSCAASGFT | --LDSYAIGWFRQAPGKERE  | GVACISASGSDTYVDSVKGRFTVSR      |
| JLU-H9  | SGGGLVQPGGSLRLSCAAPGFT | --LDYYAIGWFRQAPGKERE  | GVSCIRSRGDRNTYADSVKGRFTVSR     |
| JLU-H10 | SGGGLVQPGGSLRLSCAASGFP | --LGDYTVGWFRQAPGKERE  | GVSCISKGRSLRYGDSVKGRFTVARD     |
| JNE-B10 | SGGGLVQPGGSLRLSCAASGFP | --FHAYYMSWVRQAPGKLE   | WVSHIGNGGIITRYADSVKGRFTISR     |

B

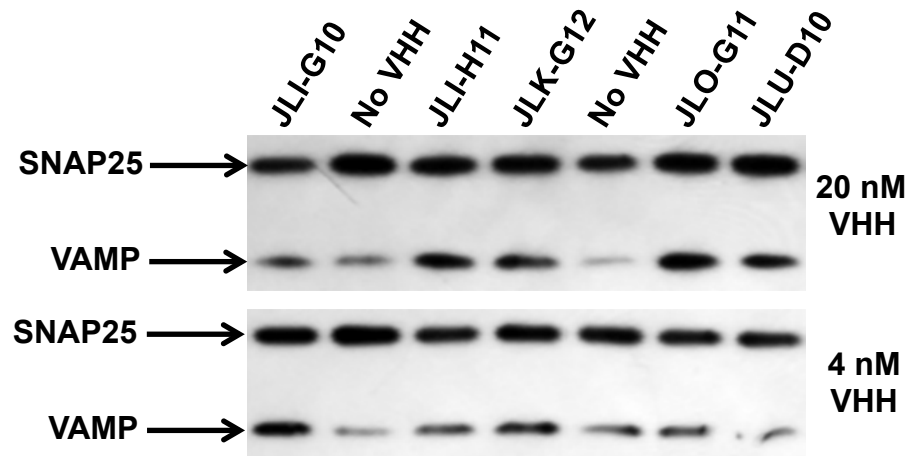

**Figure S1. Amino acid sequences and characterization of anti-BoNT/B1 VHHs. Related to Figure 2.**

(A) Amino acid sequences of anti-BoNT/B1 VHHs. The amino acid sequences of VHH JEQ-H11, JFM-A11, JFN-B5, and JFM-B9 were reported in our previous study (Mukherjee et al., 2012) and were listed here for comparison.

(B) VHH neutralization of BoNT/B1 in rat primary cerebellar neuron cultures. Purified VHHs were added to cell culture media of cerebellar primary neurons at the indicated concentrations and then 1 nM of BoNT/B1 or medium control was added. After overnight incubation, the extent of VAMP cleavage was assessed by Western blot.

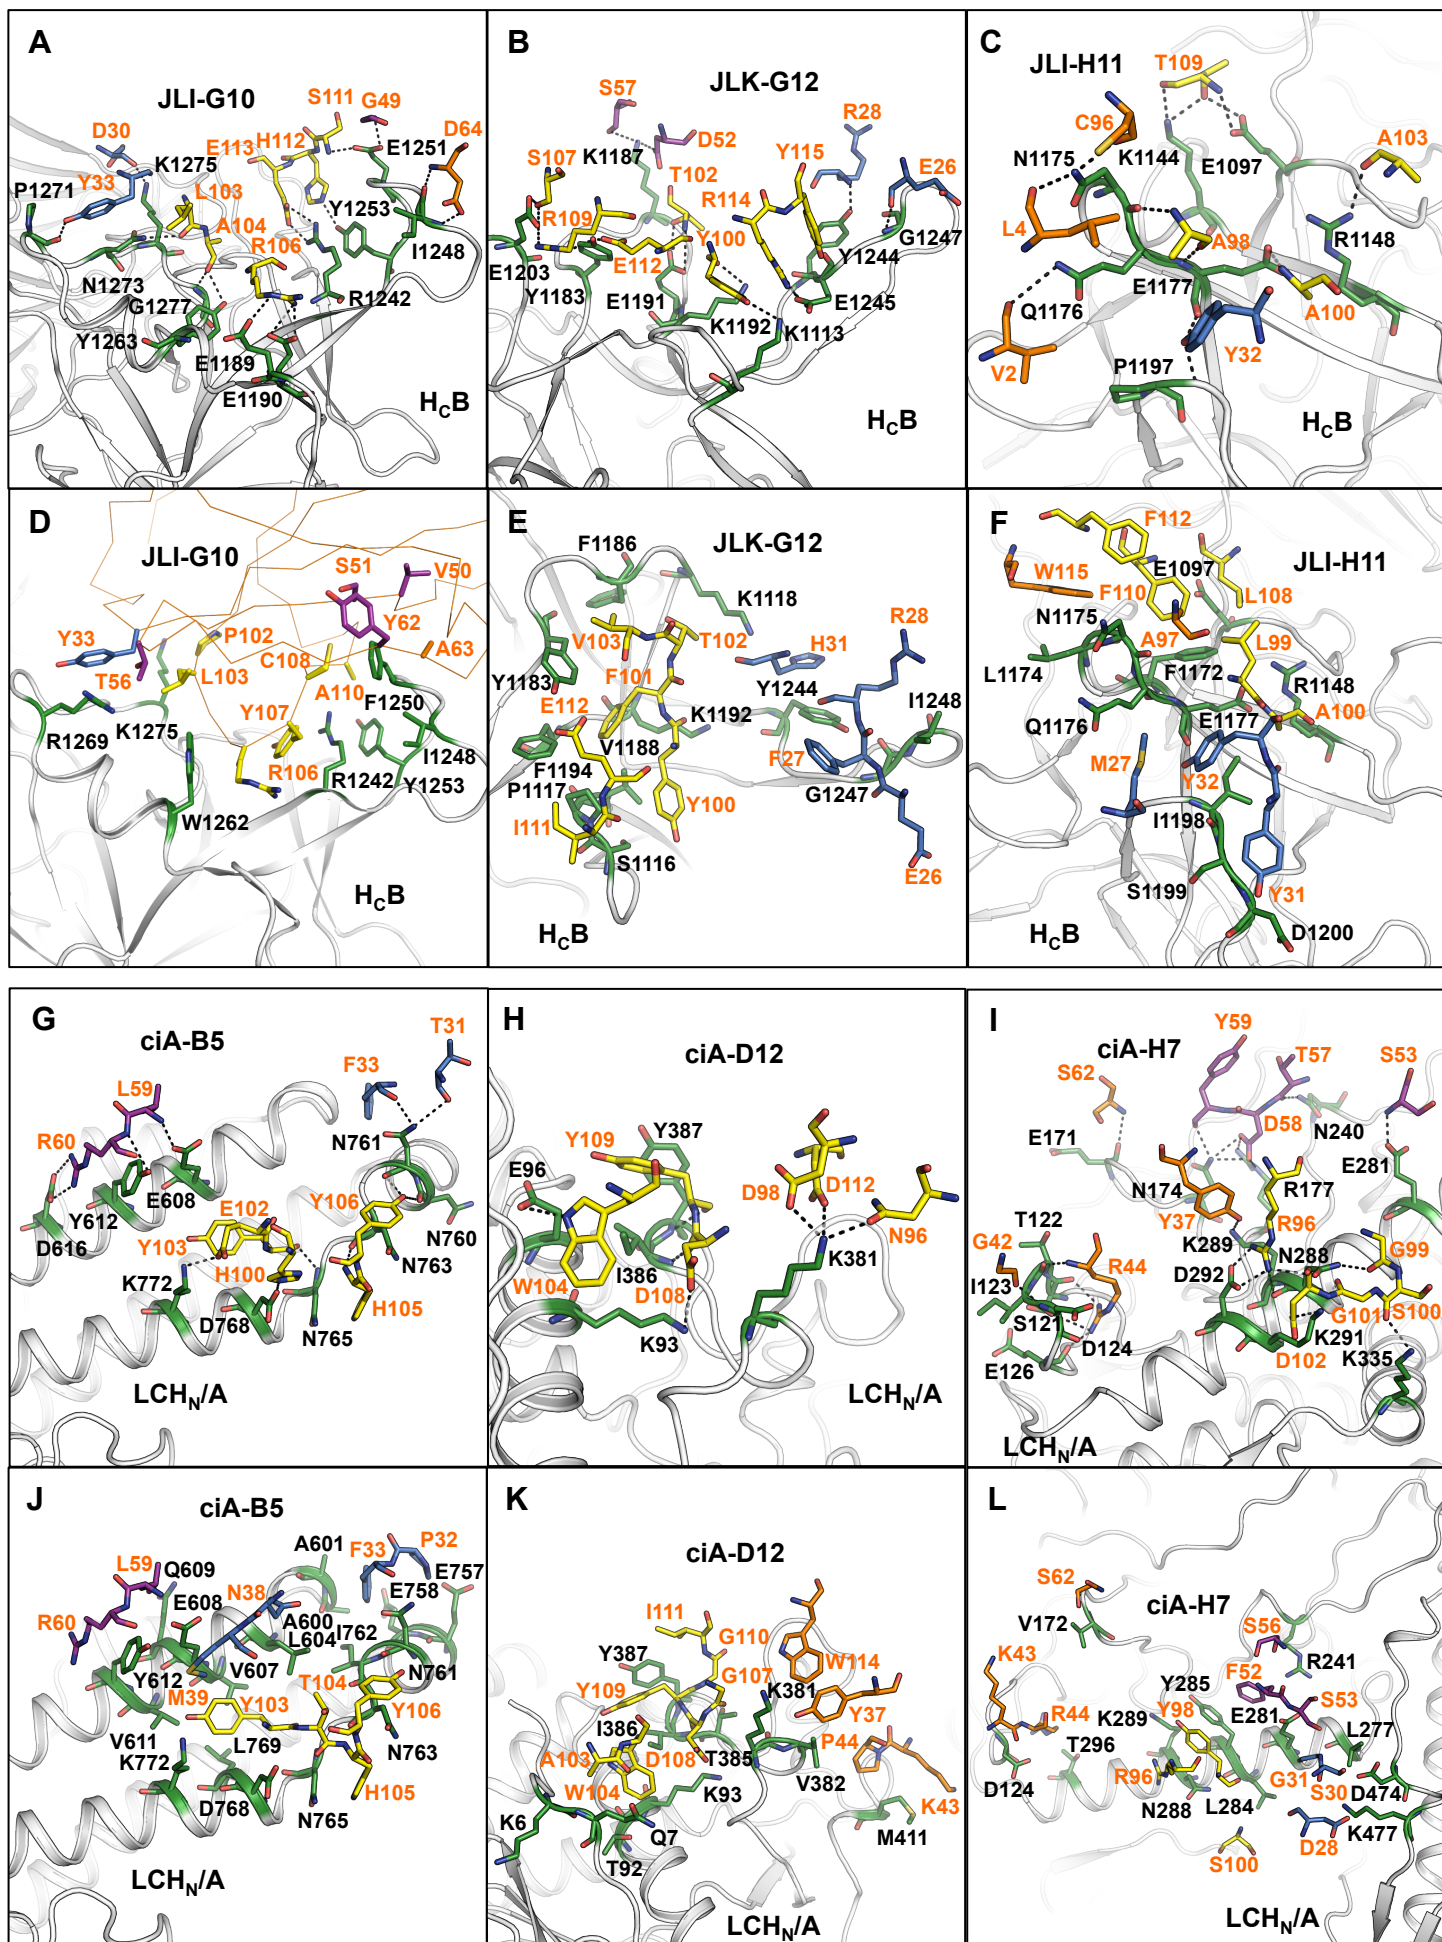

**Figure S2. Molecular interactions between H<sub>C</sub>B or LCH<sub>N</sub>/A and VHHs. Related to Figures 2–4.** Residues mediating electrostatic interactions (A–C, G–I) or hydrophobic interactions and van de Waal forces (D–F, J–L) between the toxin fragments and VHHs are shown as sticks. The VHH-binding epitopes on H<sub>C</sub>B or LCH<sub>N</sub>/A are colored green. The interacting residues in the CDR1, 2, 3 loops and the framework region of the VHHs are colored blue, purple, yellow, and orange respectively.

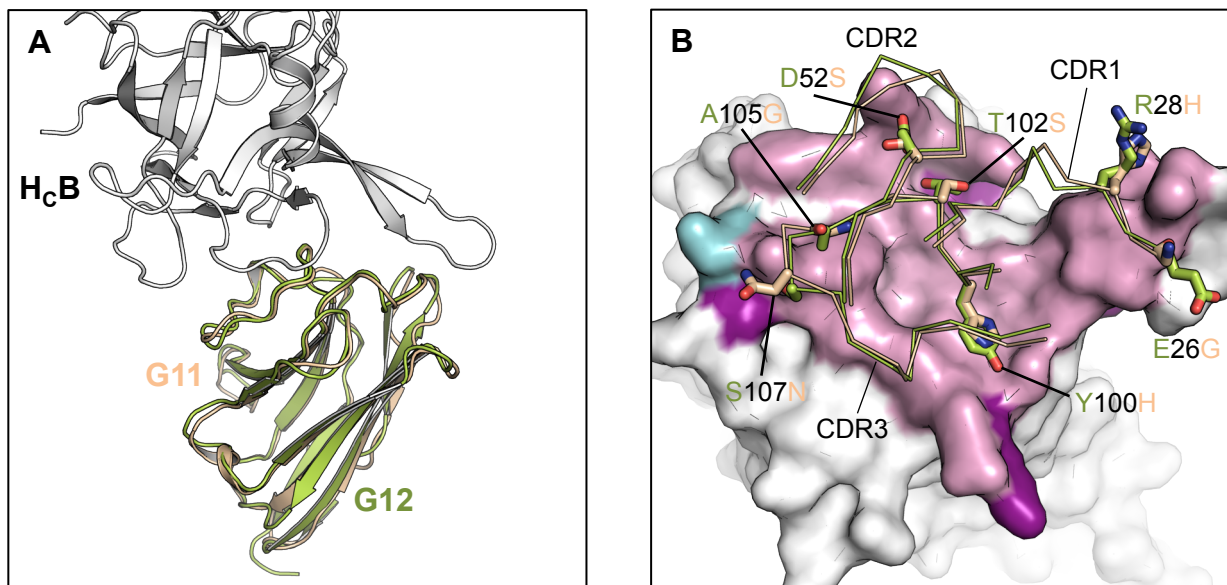

**Figure S3. Structure of the H<sub>c</sub>B-JLO-G11 complex. Related to Figure 2.**

(A) Structural superposition between the H<sub>c</sub>B-JLO-G11 and the H<sub>c</sub>B-JLK-G12 complexes indicates that the binding mode of JLO-G11 is nearly identical to JLK-G12.

(B) JLO-G11 and JLK-G12 bind to nearly identical epitopes on H<sub>c</sub>B. The JLO-G11- and JLK-G12-binding surfaces on H<sub>c</sub>B are colored cyan and magenta, respectively, while the overlapping region is colored pink. The CDR loops of the VHHs are drawn as ribbons. The H<sub>c</sub>B-interacting residues on JLO-G11 (wheat) and JLK-G12 (green) that are different between them are shown as sticks.

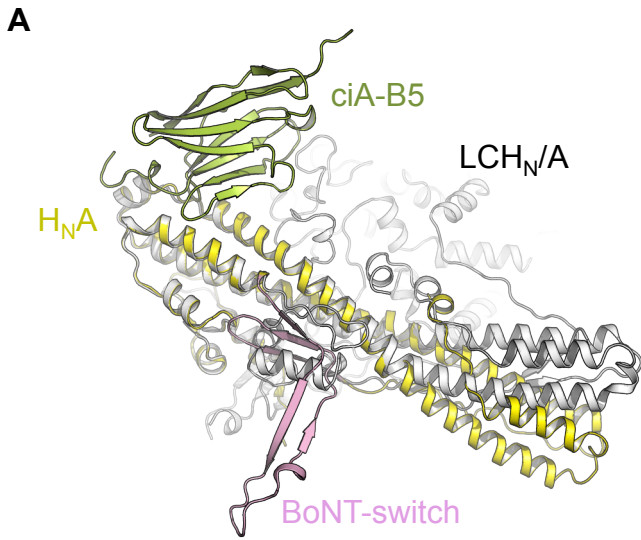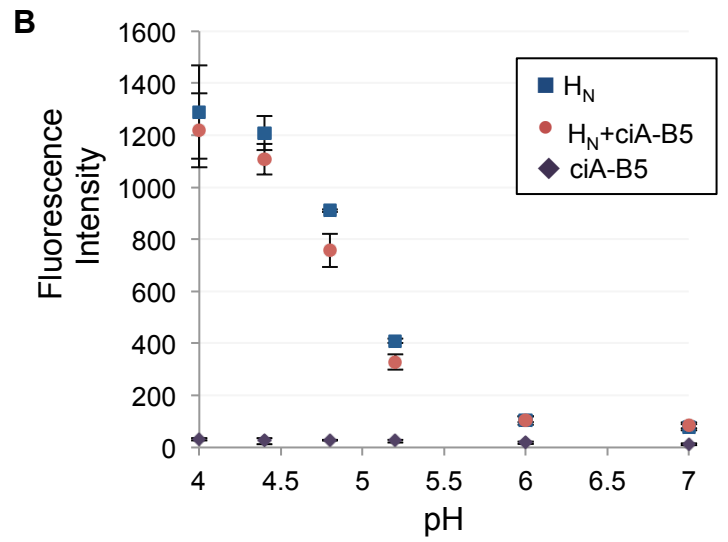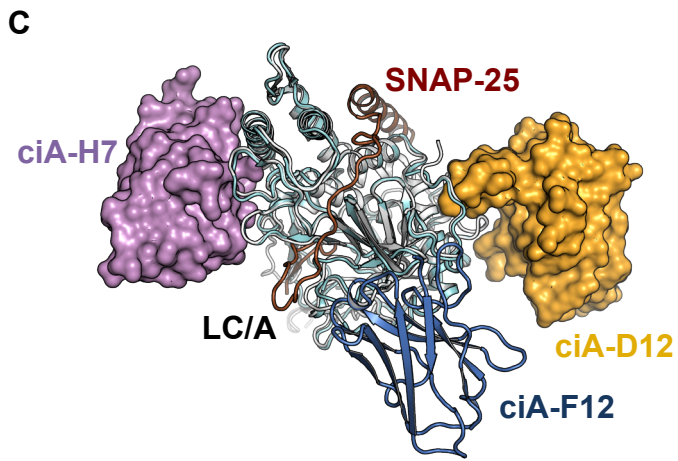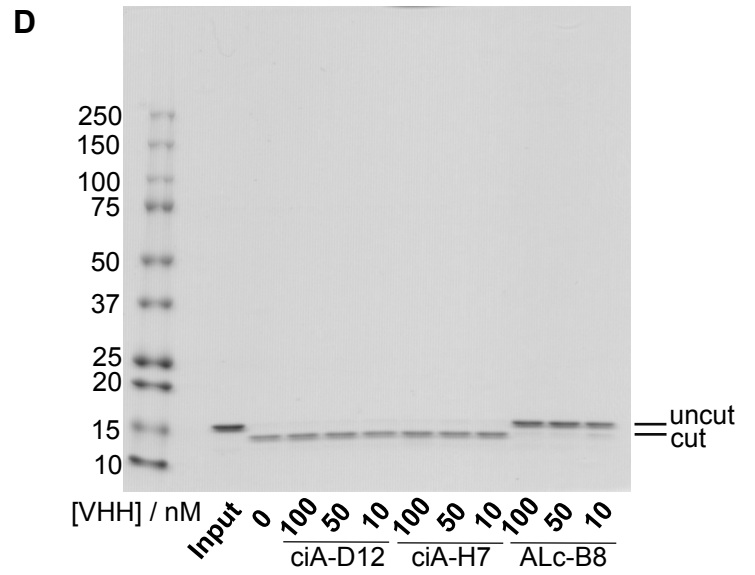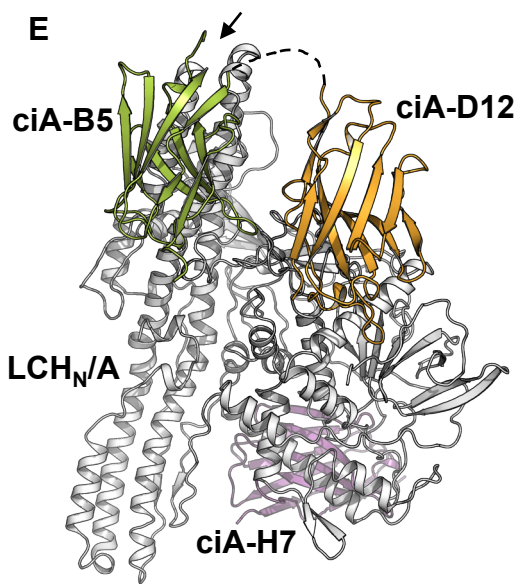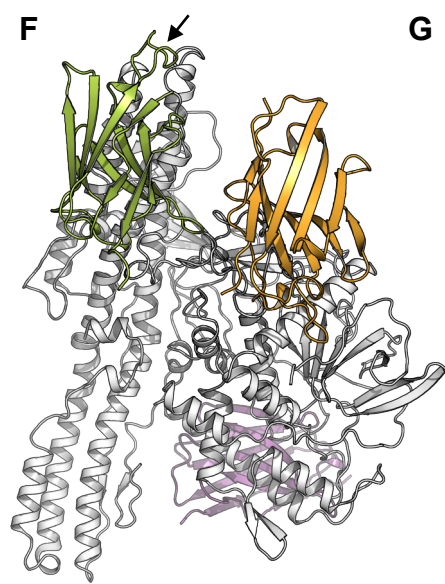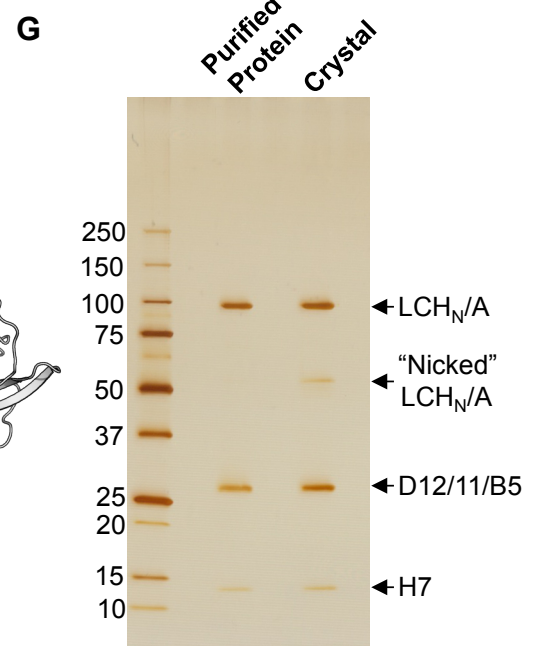

**Figure S4. Characterization of anti-BoNT/A VHHs. Related to Figures 3–5.**

(A and B) VHH ciA-B5 has no effect on the structural change of the BoNT-switch.

(A) Structural superposition between the  $LCH_N/A-B5$  complex and  $H_NA$  in the acidic-pH conformation (PDB code: 6DKK) indicates that the ciA-B5-binding epitope does not overlap with the BoNT-switch.

(B) ANS binding assay.  $H_NA$ ,  $H_NA-ciA-B5$ , or ciA-B5 alone was incubated with ANS at 25 °C for 15 min. The peak fluorescence intensity at 466 nm is shown. Error bar represents SD of three replicate experiments.

(C and D) VHHs ciA-D12 and ciA-H7 do not affect the enzymatic activity of LC/A.

(C) Superimposing the structures of the  $LC/A-D12-H7$  and the  $LC/A-SNAP-25$  complexes indicates that D12 or H7 binding does not affect the  $LC/A-SNAP-25$  interaction. Cartoon model of a non-neutralizing VHH ciA-F12 is drawn for comparison.

(D) In vitro SNAP-25 endopeptidase assay. LC/A (1 nM) was pre-incubated for 15 min with ciA-D12, ciA-H7, or a protease inhibitor ALc-B8 (10–100 nM) (Tremblay et al., 2010), respectively. The LC/A–VHH mixtures were then added to 5 mM of SNAP-25 (80–206) for 30 min at 25 °C. The gel image is a representative of three independent experiments.

(E–G) Crystal structure of the  $LCH_N/A-D12/11/B5-H7$  complex.

Structures of the  $LCH_N/A-D12/11/B5-H7$  (E) and  $LCH_N/A-B5-D12-H7$  (F) complexes are drawn in the same orientation. These two structures are almost identical (r.m.s.d. of 0.212 over 956 aligned C $\alpha$  atoms). Residues A26–P29 of ciA-B5 (arrow) and the 11-amino-acid peptide linker connecting ciA-D12 and ciA-B5 (dotted line) are not visible in the electron density map of the  $LCH_N/A-D12/11/B5-H7$  complex. As shown in panel (G), D12/11/B5 remained intact during crystallization. Therefore, its peptide linker was present in the crystal, likely adopting a flexible conformation.

(G) Crystals of the  $LCH_N/A-D12/11/B5-H7$  complex were isolated, washed five times with the mother liquor, and then denatured in SDS loading dye and analyzed by SDS-PAGE.

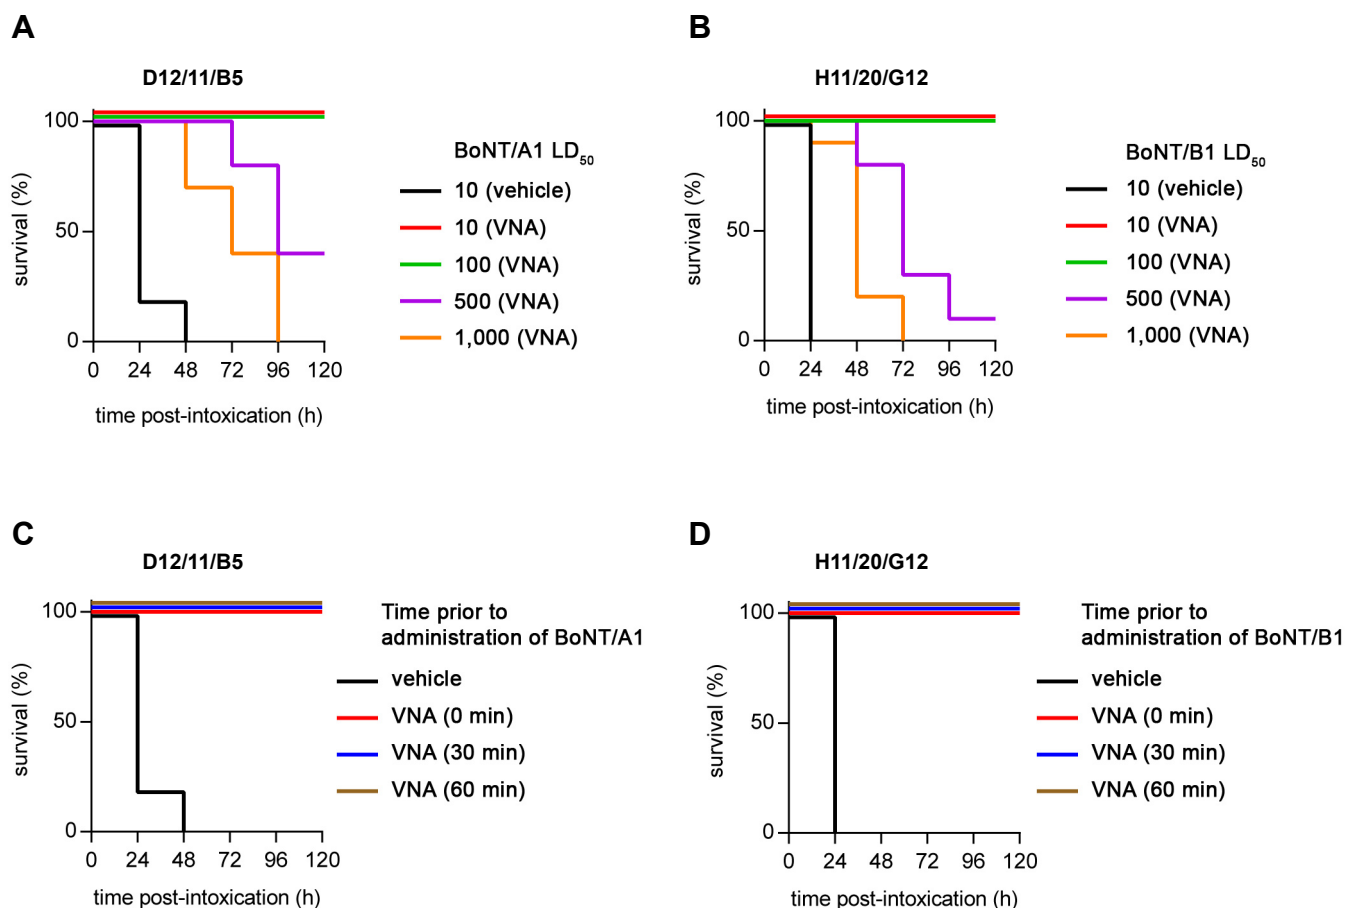

**Figure S5. BoNT/A1 or BoNT/B1 intoxication in mice is prevented by separate administration of designer VNAs. Related to Figures 6–7.**

(A and B) Symptoms of BoNT/A1 (A) or BoNT/B1 (B) intoxication and lethality were monitored following administration of bivalent VNA D12/11/B5 (A), H11/20/G12 (B), or toxin only. Time to death is plotted as % survival following IP injection of the indicated dose of toxin at 5 min after IV administration of VNAs in groups of five mice.

(C and D) VNA D12/11/B5 (C) and H11/20/G12 (D) were administered at indicated time points prior to injection of 10 LD<sub>50</sub> of BoNT/A1 and BoNT/B1, respectively.



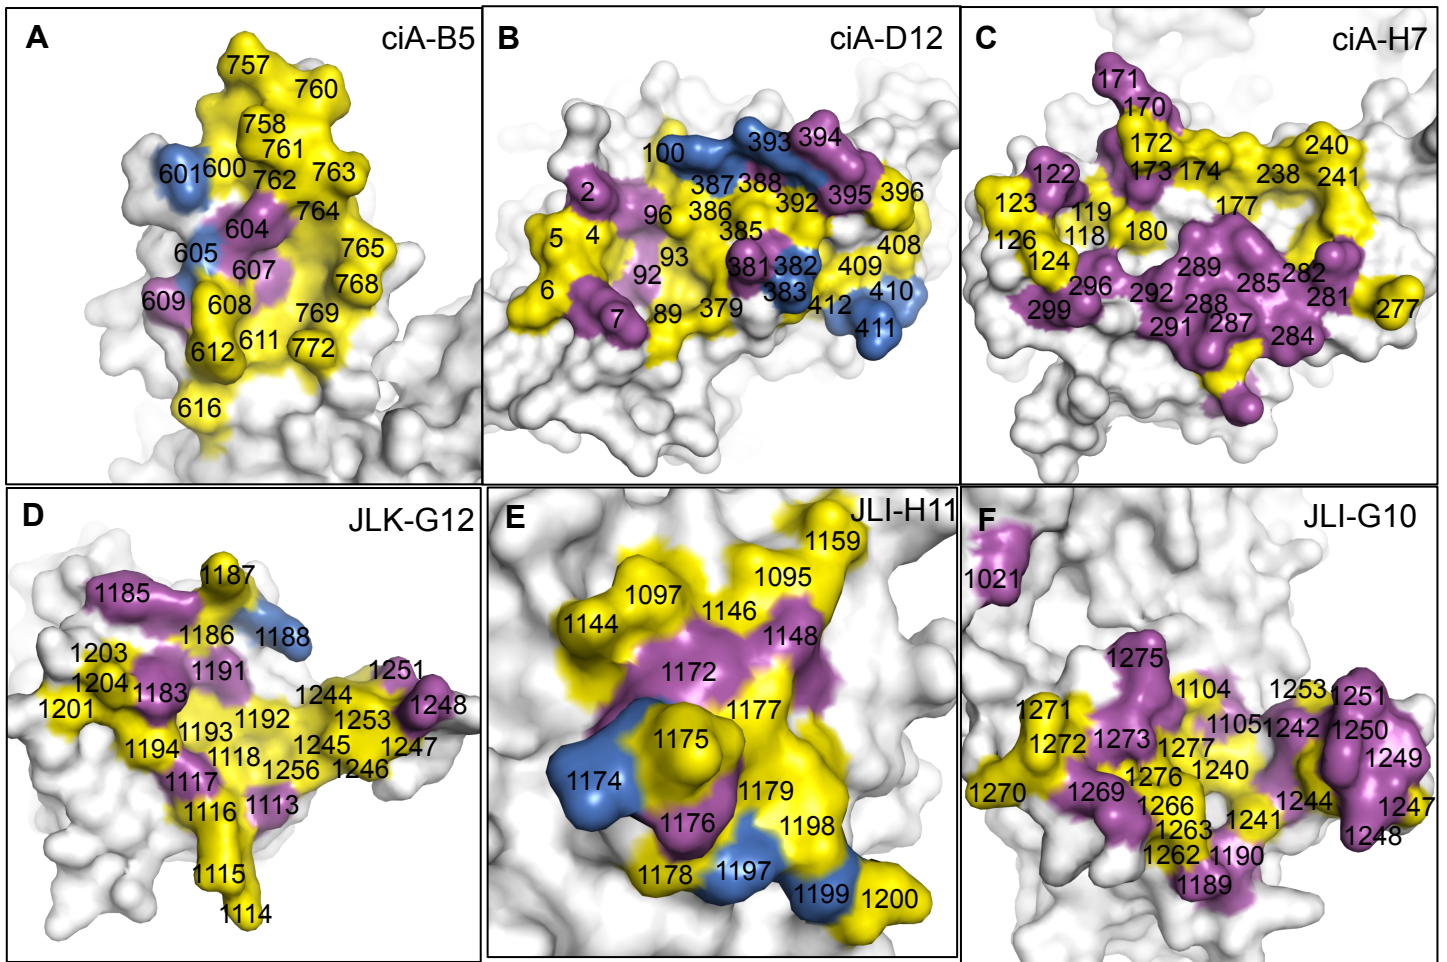

**G** ciA-B5

|              | % ID   | % SIM  |                              |
|--------------|--------|--------|------------------------------|
| A1           |        |        | AALGVVEQVYDEENNINFNDLK       |
| A2           | 80.95  | 90.48  | AFLNAAEEVYDEENNINFNDLK       |
| A3           | 80.95  | 95.24  | AVLSAAEEVYDEENNINFNDLK       |
| A4           | 76.19  | 95.24  | AVVNIEENVYDEENNINFNDLK       |
| A5           | 100.00 | 100.00 | AALGVVEQVYDEENNINFNDLK       |
| A6           | 100.00 | 100.00 | AALGVVEQVYDEENNINFNDLK       |
| A7           | 100.00 | 100.00 | AALGVVEQVYDEENNINFNDLK       |
| A8           | 100.00 | 100.00 | AALGVVEQVYDEENNINFNDLK       |
| consensus>70 |        |        | A . I . v E # VYDEENNINFNDLK |

**J** JLK-G12

|              | % ID  | % SIM |                                 |
|--------------|-------|-------|---------------------------------|
| B1           |       |       | KKDSSVYDFKKEKLFSEFYESGILEYY     |
| B2           | 80.77 | 80.77 | KKDSSVYDFKKEKLFSEFYESGILEYY     |
| B3           | 88.46 | 88.46 | KKDSSVYDFKKEKLFSEFYESGILEYY     |
| B4           | 69.23 | 73.08 | VKDSSVYNFKKEKLFSEFYESGKYYV      |
| B5           | 92.31 | 92.31 | KKDSSVYDFKKEKLFSEFYESGILEYY     |
| B6           | 88.46 | 88.46 | KKDSSVYDFKKEKLFSEFYESGILEYY     |
| B7           | 73.08 | 73.08 | VKDSSVYNFKKEKLFSEFYESGKYYI      |
| B8           | 73.08 | 80.77 | KKDSSVYDFKKEKLFSEFYESGQYYE      |
| consensus>70 |       |       | kKDSsVydFK . eKLFSEFYESG . . Yy |

**H** ciA-D12

|              | % ID   | % SIM  |                                       |
|--------------|--------|--------|---------------------------------------|
| A1           |        |        | PVnkQkTKESVdENTIKDLKGNINSRN           |
| A2           | 71.43  | 75.00  | PVnkQkTKESVdENTIKDLKGNINSRN           |
| A3           | 57.14  | 64.29  | PVnkQkTKESVdENTIKDLKGNINSRN           |
| A4           | 85.71  | 85.71  | PVnkQkTKESVdENTIKDLKGNINSRN           |
| A5           | 92.86  | 92.86  | LVnkQkTKESVdENTIKDLKGNINSRN           |
| A6           | 100.00 | 100.00 | PVnkQkTKESVdENTIKDLKGNINSRN           |
| A7           | 96.43  | 96.43  | PVnkQkTKESVdENTIKDLKGNINSRN           |
| A8           | 78.57  | 82.14  | PVnkQkTKESVdENTIKDLKGNINSRN           |
| consensus>70 |        |        | pVnKqKtK#SVd . NTI . #L . ntNIN . . N |

**K** JLI-H11

|              | % ID   | % SIM  |                         |
|--------------|--------|--------|-------------------------|
| B1           |        |        | NEKIRDFLNQEWRPISD       |
| B2           | 76.47  | 76.47  | NEKIRDFLNQEWRNIIYD      |
| B3           | 88.24  | 88.24  | NEKIRDFLNQEWRNIIYD      |
| B4           | 70.59  | 76.47  | NEKIRDFLNQEWRIIYD       |
| B5           | 100.00 | 100.00 | NEKIRDFLNQEWRPISD       |
| B6           | 100.00 | 100.00 | NEKIRDFLNQEWRPISD       |
| B7           | 76.47  | 76.47  | NEKIRDFLNQEWRNIIYD      |
| B8           | 82.35  | 88.24  | NEKIRDFLNQEWRIID        |
| consensus>70 |        |        | NEKIRdf . NqEWR . I . D |

**I** ciA-H7

|              | % ID   | % SIM  |                                |
|--------------|--------|--------|--------------------------------|
| A1           |        |        | WGStIDEHEVlnRYNNRlEFLyY#kkdtkk |
| A2           | 96.67  | 100.00 | WGStIDEHDVlnRYNNRlEFLyY#kkdtkk |
| A3           | 63.33  | 70.00  | WGStIDEHDVlnRYNNRlEFLyY#kkdtkk |
| A4           | 83.33  | 90.00  | WGgKIDEddVlnRYNNRlEFLyY#kkdtkk |
| A5           | 96.67  | 100.00 | WGStIDEHDVlnRYNNRlEFLyY#kkdtkk |
| A6           | 100.00 | 100.00 | WGStIDEHEVlnRYNNRlEFLyY#kkdtkk |
| A7           | 90.00  | 96.67  | WGStIDEHDVlnRYNNRlEFLyY#kkdtkk |
| A8           | 96.67  | 100.00 | WGStIDEHDVlnRYNNRlEFLyY#kkdtkk |
| consensus>70 |        |        | WGstIDEh#VlnRYNNRlEFLyY#kkdtkk |

**L** JLI-G10

|              | % ID  | % SIM |                             |
|--------------|-------|-------|-----------------------------|
| B1           |       |       | KGNEEIhRYGIVfKYWYERKPYnLg   |
| B2           | 88.46 | 88.46 | KGNEEIhRYGIVLKYWYERKPYnLg   |
| B3           | 88.46 | 88.46 | KGnKEIhRYGIVfKYWYERKPYnLg   |
| B4           | 69.23 | 80.77 | TGNQEIhRYGIVLKYWYERKPYnLg   |
| B5           | 96.15 | 96.15 | KGNEEIhRYGIVfKYWYERKPYnLg   |
| B6           | 88.46 | 88.46 | KGnKEIhRYGIVfKYWYERKPYnLg   |
| B7           | 73.08 | 84.62 | KGnQEIhRYGILfKYWYERKPYnLg   |
| B8           | 76.92 | 84.62 | KGsKEIhRYGIVfKYWYERKPYnLg   |
| consensus>70 |       |       | kGn . EIhRYGivfKYWYERKPYnLg |

**Figure S6. Sequence conservation of the VHH-binding epitopes across BoNT/A and BoNT/B subtypes. Related to Figures 2–4.**

(A–F) LCH<sub>N</sub>/A (A–C) or H<sub>C</sub>B (D–F) is drawn in surface. Identical, conserved, and variable residues at the BoNT/A–VHH or BoNT/B–VHH interface are colored yellow, purple, and blue, respectively.

(G–L) Amino acid sequence alignment among BoNT/A (G–I) or BoNT/B (J–L) subtypes. Only the VHH-binding epitopes are shown. The percentage of sequence identity (%ID) and similarity (%SIM) are shown. Sequence alignments were performed using Clustal Omega and displayed with ESPript 3.0.

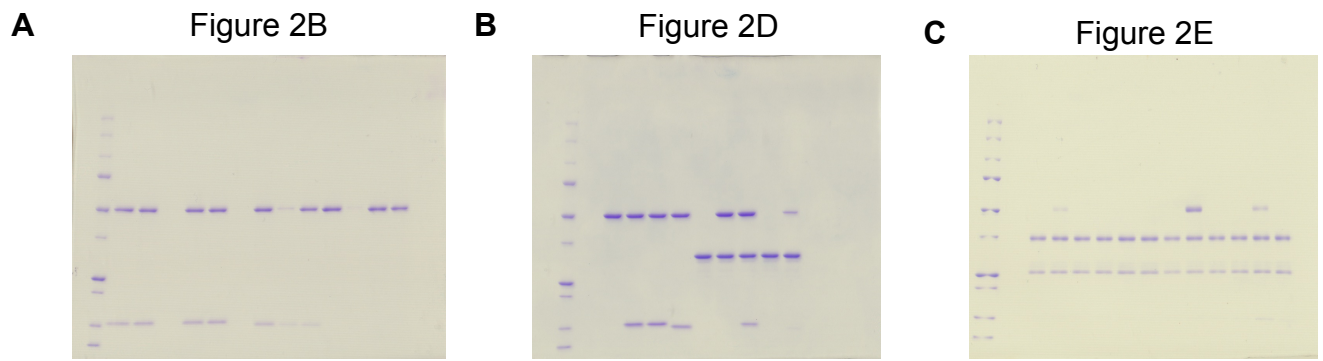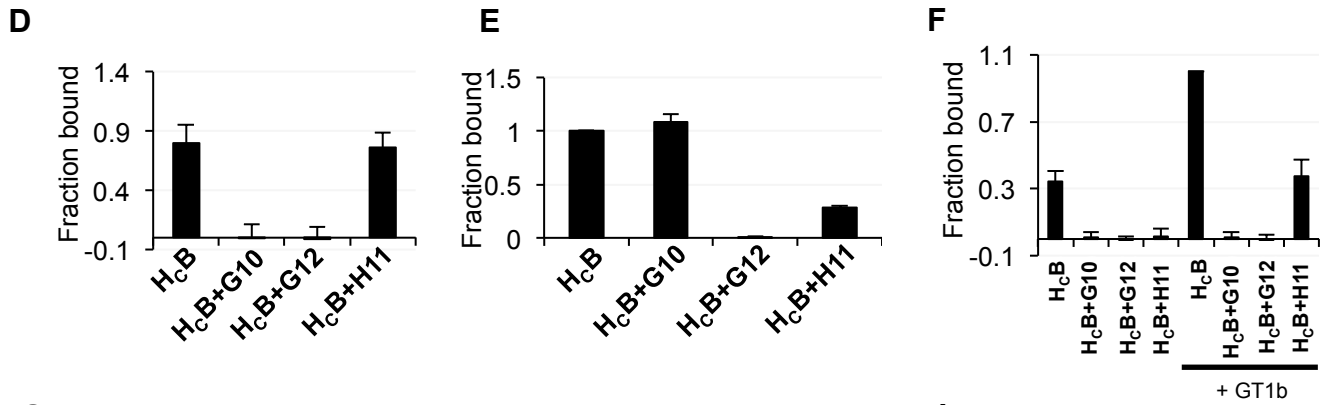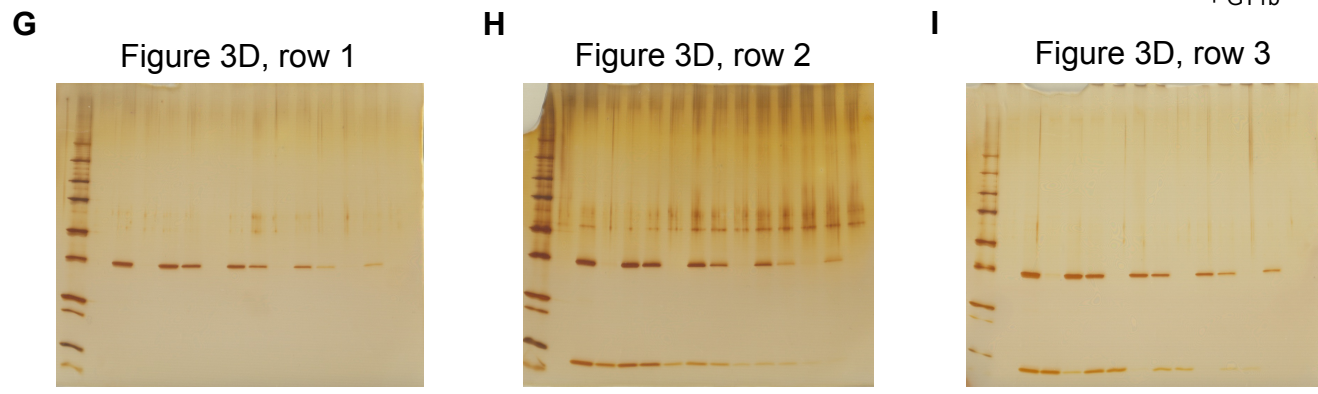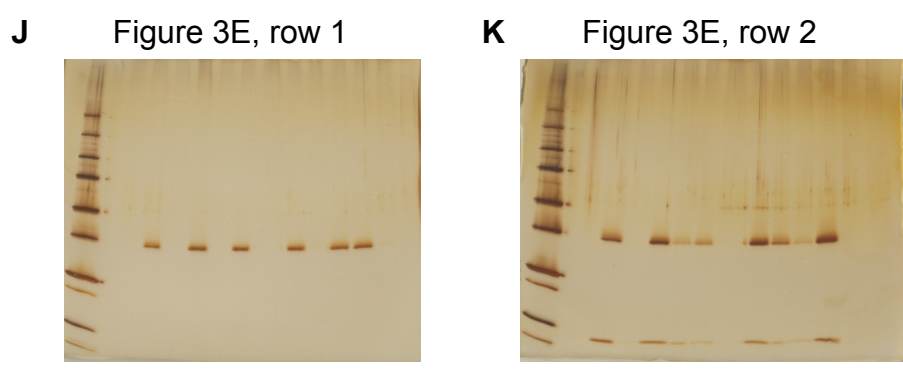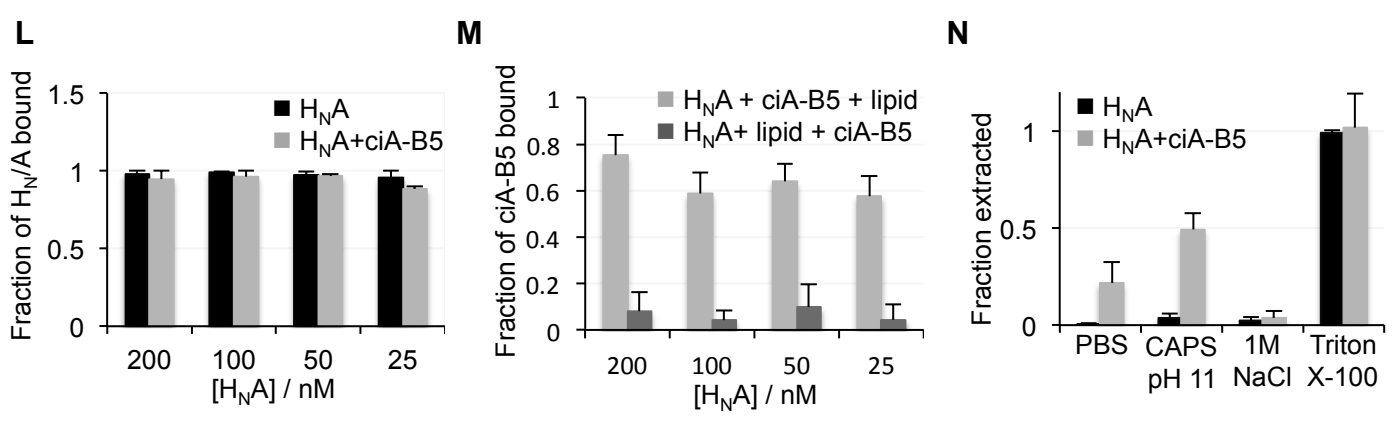

**Figure S7. Uncropped images and quantification of data shown in Figures 2–3.**

(A–C) Uncropped images for data shown in Figure 2.

(D–F) Quantification of results shown in Figure 2B, 2D, and 2E.

(D) The intensities of protein bands were quantified for the input and the supernatant fractions. The fraction of the bound-H<sub>C</sub>B was calculated as  $1 - (\text{band intensity of unbound protein} / \text{input protein})$ .

(E) The band intensities of the bound H<sub>C</sub>B in the presence of VHH were quantified and represented as  $(\text{Intensity} / \text{Intensity of binding of H}_{\text{C}}\text{B alone})$ .

(F) The band intensities of the bound H<sub>C</sub>B were quantified and represented as  $(\text{Intensity} / \text{Intensity of binding of H}_{\text{C}}\text{B with GST-Syt II in the presence of GT1b})$ .

(G–K) Uncropped images for data shown in Figure 3.

(L–N) Quantification of results shown in Figure 3D–E.

(L) The band intensities of H<sub>N</sub>A were quantified for the input and the supernatant fractions.

(M) The band intensities of ciA-B5 were quantified. The fraction of the bound-protein was calculated as  $1 - (\text{band intensity of unbound protein} / \text{input protein})$ .

(N) The band intensities of H<sub>N</sub>A were quantified for the pellet fraction without treatment and the resuspended soluble fraction (S2). The fraction of the extracted protein was calculated as a ratio of band intensities of H<sub>N</sub>A after and before extraction. The data are presented as mean ± S.D., n = 3.

| <b>Protein<sup>A</sup></b> | <b>Subunit<sup>B</sup></b> | <b>Neutralization<sup>C</sup></b> | <b>EC<sub>50</sub> (nM)<sup>D</sup></b> |
|----------------------------|----------------------------|-----------------------------------|-----------------------------------------|
| JEQ-H11                    | Hc                         | No                                | 0.2                                     |
| JFM-A11 <sup>E</sup>       | Hc                         | Yes                               | 0.6                                     |
| JFM-B9                     | Hc                         | No                                | 0.8                                     |
| JFN-B5                     | Hc                         | No                                | 0.4                                     |
| JLI-G10 <sup>E</sup>       | Hc                         | Yes                               | 0.3                                     |
| JLI-H11                    | Hc                         | Yes                               | 10*                                     |
| JLJ-F9                     | Lc                         | No                                | 10*                                     |
| JLJ-G3                     | Lc                         | No                                | 0.7                                     |
| JLK-D7                     | Hc                         | No                                | 0.1                                     |
| JLK-G12                    | Hc                         | Yes                               | 0.5                                     |
| JLO-C8                     | Hc                         | No                                | 1*                                      |
| JLO-G7                     | Lc                         | No                                | 1*                                      |
| JLO-G11                    | Hc                         | Yes                               | 0.5                                     |
| JLU-D10                    | unknown                    | Yes                               | 2*                                      |
| JLU-H9                     | unknown                    | No                                | trace*                                  |
| JLU-H10                    | unknown                    | No                                | 0.1                                     |
| JNE-B10                    | Lc                         | No                                | 1                                       |

**Table S1. A summary of anti-BoNT/B VHH characterization data. Related to Figures 1–2.**

<sup>A</sup> Lab code given to each VHH.

<sup>B</sup> Subunit recognition was assessed by ELISA with purified BoNT light chain (LC) or heavy chain C-terminus (H<sub>C</sub>). VHHs recognizing BoNT holotoxin without recognition of purified LC or H<sub>C</sub> are indicated as unknown (likely H<sub>N</sub> or LCH<sub>N</sub>).

<sup>C</sup> VHH neutralization was determined by the ability of VHHs (20 nM) to clearly inhibit VAMP cleavage following overnight incubation of primary neurons with 1 nM BoNT/B1.

<sup>D</sup> The EC<sub>50</sub> was the VHH concentration that produced about 50% of the peak signal on a serial dilution ELISA on ciBoNT/B1-coated Costar plates.

<sup>E</sup> JFM-A11 reported in our earlier study is clonally related to JLI-G10 while JLI-G10 displayed a higher binding affinity to BoNT/B1 than JFM-A11 (Mukherjee et al., 2012), therefore we focused on JLI-G10 in this study.

\* These VHHs improved to sub-nM EC<sub>50</sub> in ELISAs when BoNT/B1 was captured onto plastic plates with an antibody, suggestive of conformation-dependent epitopes.

**Table S2. Data collection and refinement statistics. Related to Figures 1–4.**

|                                           | H <sub>c</sub> B–JLI-G10                 | H <sub>c</sub> B–JLK-G12   | H <sub>c</sub> B–JLI-H11   | H <sub>c</sub> B–JLO-G11    | LCH <sub>N</sub> /A–B5–<br>D12–H7 | LCH <sub>N</sub> /A–<br>D12/11/B5–H7 |
|-------------------------------------------|------------------------------------------|----------------------------|----------------------------|-----------------------------|-----------------------------------|--------------------------------------|
| <b>Data collection</b>                    |                                          |                            |                            |                             |                                   |                                      |
| Space group                               | P 63                                     | C 1 2 1                    | P 1                        | C 2 2 21                    | C 1 2 1                           | C 1 2 1                              |
| Cell dimensions                           |                                          |                            |                            |                             |                                   |                                      |
| <i>a</i> , <i>b</i> , <i>c</i> (Å)        | 223.1, 223.1, 58.49                      | 153.24, 53.19,<br>114.41   | 71.21, 73.28, 76.37        | 56.30, 267.90,<br>144.69    | 141.04, 89.36,<br>143.69          | 141.3, 90.25, 144.8                  |
| <i>α</i> , <i>β</i> , <i>γ</i> (°)        | 90, 90, 120                              | 90, 92.35, 90              | 87.83, 65.75, 66.55        | 90.00, 90.00, 90.00         | 90, 118.93, 90                    | 90, 119, 90                          |
| Resolution (Å)                            | 111.57–2.20 (2.24–<br>2.20) <sup>a</sup> | 38.28–2.90 (3.08–<br>2.90) | 44.58–2.32 (2.39–<br>2.32) | 144.69–3.18 (3.40–<br>3.18) | 37.74–2.20 (2.25–<br>2.20)        | 47.21–2.02 (2.05–<br>2.02)           |
| R <sub>merge</sub>                        | 0.096 (0.722)                            | 0.120 (0.611)              | 0.055 (0.484)              | 0.153 (1.843)               | 0.049 (0.208)                     | 0.094 (0.716)                        |
| CC1/2                                     | 0.994 (0.733)                            | 0.964 (0.684)              | 0.997 (0.810)              | 0.990 (0.376)               | 0.997 (0.965)                     | 0.995 (0.648)                        |
| I/σ(I)                                    | 10.2 (2.0)                               | 7.4 (1.7)                  | 13.9 (2.2)                 | 8.5 (0.8)                   | 10.2 (3.7)                        | 9.8 (2.0)                            |
| Completeness (%)                          | 99.2 (99.9)                              | 96.7 (97.9)                | 98.6 (97.8)                | 99.0 (98.3)                 | 95.0 (97.5)                       | 99.8 (99.9)                          |
| Redundancy                                | 4.9 (5.0)                                | 3.2 (3.3)                  | 3.9 (3.8)                  | 3.6 (3.6)                   | 2.6 (2.6)                         | 3.7 (3.8)                            |
| <b>Refinement</b>                         |                                          |                            |                            |                             |                                   |                                      |
| Resolution (Å)                            | 96.63–2.20                               | 38.28–2.90                 | 37.48–2.32                 | 45.38–3.18                  | 37.16–2.20                        | 47.21–2.02                           |
| No. reflections                           | 84236                                    | 20026                      | 54471                      | 18355                       | 75238                             | 103988                               |
| Reflections used for<br>R <sub>free</sub> | 4213                                     | 1029                       | 2764                       | 865                         | 3774                              | 5185                                 |
| R <sub>work</sub> /R <sub>free</sub>      | 0.194/0.211                              | 0.212/0.258                | 0.170/0.222                | 0.204/0.258                 | 0.181/0.229                       | 0.183/0.195                          |
| No. atoms                                 | 9563                                     | 4621                       | 9263                       | 4599                        | 10088                             | 10407                                |
| Protein                                   | 9155                                     | 4597                       | 8938                       | 4599                        | 9564                              | 9608                                 |
| Ligand/ion                                | -                                        | 10                         | -                          | -                           | -                                 | -                                    |
| Water                                     | 408                                      | 14                         | 325                        | -                           | 524                               | 799                                  |
| B-factors                                 | 46.2                                     | 47.3                       | 52.00                      | 99.60                       | 34.90                             | 37.50                                |
| Protein                                   | 46.3                                     | 47.2                       | 52.20                      | 99.60                       | 34.70                             | 37.20                                |
| Ligand/ion                                | -                                        | 97.7                       | -                          | -                           | -                                 | -                                    |
| Water                                     | 43.8                                     | 36.2                       | 44.90                      | -                           | 38.10                             | 40.10                                |
| R.m.s. deviations                         |                                          |                            |                            |                             |                                   |                                      |
| Bond lengths (Å)                          | 0.008                                    | 0.004                      | 0.008                      | 0.004                       | 0.008                             | 0.016                                |
| Bond angles (°)                           | 1.120                                    | 0.697                      | 1.018                      | 0.810                       | 1.09                              | 1.446                                |

One crystal was used for each structure.

<sup>a</sup> Statistics for the highest-resolution shell are shown in parentheses.

**Table S3. A summary of the in vivo toxin neutralization studies of the designer VNAs. Related to Figures 5–7.**

| VNA               | Distance / Å | Spacer length (a.a.) | Simultaneous binder? | BoNT LD <sub>50</sub> | Survival at 96 hours (Alive / Tested) |
|-------------------|--------------|----------------------|----------------------|-----------------------|---------------------------------------|
| ciA-D12...ciA-B5  | 17           | 11                   | Yes                  | 100                   | 10 / 10                               |
|                   |              |                      |                      | 500                   | 0 / 5                                 |
|                   |              |                      |                      | 1,000                 | 0 / 5                                 |
|                   |              |                      |                      | 2,500                 | 0 / 5                                 |
|                   |              |                      |                      | 10,000                | 0 / 5                                 |
| ciA-D12...ciA-H7  | 92           | 11                   | No                   | 100                   | 1 / 10                                |
|                   |              |                      |                      | 500                   | 0 / 5                                 |
|                   |              |                      |                      | 1,000                 | 0 / 5                                 |
|                   |              |                      |                      | 2,500                 | 0 / 5                                 |
| JLI-G10...JLI-G12 | 37           | 12                   | Yes                  | 100                   | 5 / 5                                 |
|                   |              |                      |                      | 200                   | 5 / 5                                 |
|                   |              |                      |                      | 1,000                 | 10 / 10                               |
|                   |              |                      |                      | 5,000                 | 2 / 5                                 |
|                   |              |                      |                      | 10,000                | 0 / 5                                 |
| JLK-G12...JLI-G10 | 80           | 5                    | No                   | 100                   | 1 / 5                                 |
|                   |              |                      |                      | 200                   | 0 / 5                                 |
|                   |              |                      |                      | 1,000                 | 1 / 10                                |
|                   |              |                      |                      | 5,000                 | 1 / 5                                 |
| JLI-H11...JLK-G12 | 61           | 20                   | Yes                  | 100                   | 5 / 5                                 |
|                   |              |                      |                      | 200                   | 5 / 5                                 |
|                   |              |                      |                      | 1,000                 | 10 / 10                               |
|                   |              | 3                    | No                   | 5,000                 | 1 / 5                                 |
|                   |              |                      |                      | 10,000                | 2 / 5                                 |
|                   |              |                      |                      | 100                   | 5 / 5                                 |
|                   |              |                      |                      | 200                   | 5 / 5                                 |
|                   |              |                      |                      | 1,000                 | 1 / 10                                |
|                   |              |                      |                      | 5,000                 | 2 / 5                                 |
|                   |              |                      |                      | 10,000                | 0 / 5                                 |
